# Supplementary material for: Targeted Delivery of the HLA-B∗27-Binding Peptide into the Endoplasmic Reticulum Suppresses the IL-23/IL-17 Axis of Immune Cells in Spondylarthritis
Source: Hindawi journal article supplement (doi:10.1155/2017/4016802), 2017-01-01
Supplement: f1 [file 4016802.f1.pdf]

Supplementary Figure S1: Sequences of primers used for PCR

| Protein | Step | forward                                           | reverse                                     |
|---------|------|---------------------------------------------------|---------------------------------------------|
| THUNP   | 1    | aggagacgacgacgaagacatcatcatca<br>tcatcatatgcagata | ggcccagtacctgctaccacctctca<br>gtcttaagac    |
|         | 2    | ggcaggaagaagaggagacgacgac<br>gaaga                | tctggtccttatggcccagfacctgct<br>accac        |
| THUA    | 1    | aggagacgacgacgaagacatcatcatca<br>tcatcatatgcagata | ggtgaggatgcctctcttaccacctc<br>tcagtcttaagac |
|         | 2    | ggcaggaagaagaggagacgacgac<br>gaaga                | gtacttcagggtgaggatgcctctct<br>t             |
| THU     | 1    | aggagacgacgacgaagacatcatcatca<br>tcatcatatgcagata | accacctctcagtcttaagacc                      |
|         | 2    | ggcaggaagaagaggagacgacgac<br>gaaga                | accacctctcagtcttaagacc                      |
| HUA     | 1    | catcatcatcatcatcatatgcagat<br>attegtgaaaaccctg    | ggtgaggatgcctctcttaccacctc<br>tcagtcttaagac |
|         | 2    | catcatcatcatcatcatatgcagat<br>attegtgaaaaccctg    | gtacttcagggtgaggatgcctctct<br>t             |
| HUNP    | 1    | catcatcatcatcatcatatgcagat<br>attegtgaaaaccctg    | ggcccagtacctgctaccacctctca<br>gtcttaagac    |
|         | 2    | catcatcatcatcatcatatgcagat<br>attegtgaaaaccctg    | tctggtccttatggcccagfacctgct<br>accac        |
